# Supplementary material for: Adipocyte glucocorticoid receptor is important in lipolysis and insulin resistance due to exogenous steroids, but not insulin resistance caused by high fat feeding
Source: PubMed Central journal article supplement — Mol Metab. 2017 Jun 29;6(10):1150–60. doi: 10.1016/j.molmet.2017.06.013 (PMC5641598; doi:10.1016/j.molmet.2017.06.013), 2017-06-29

# Supplementary Figure 1.

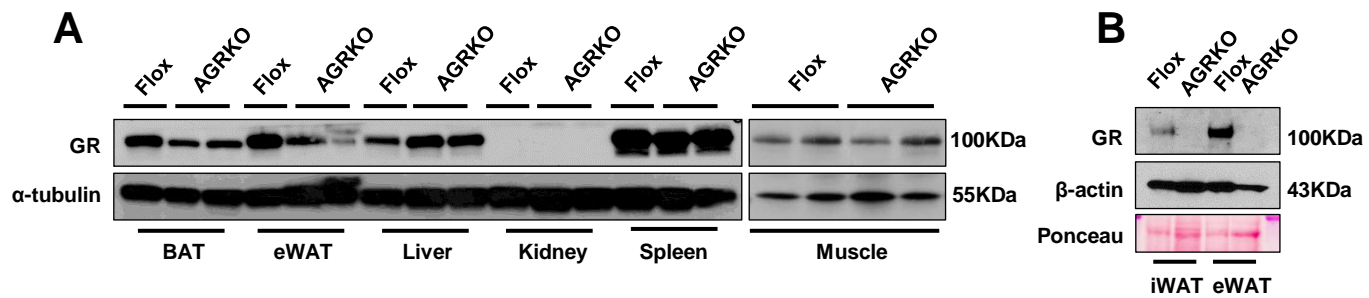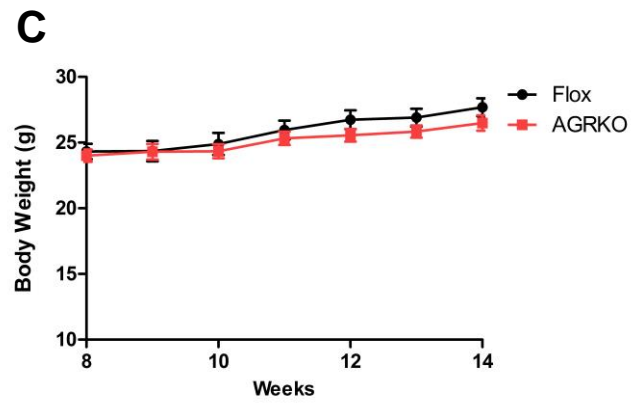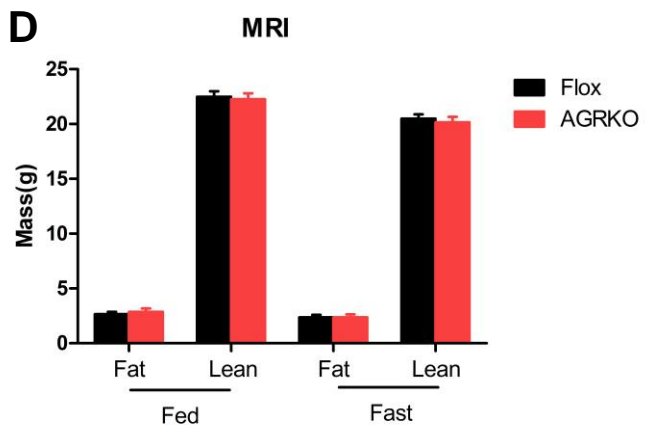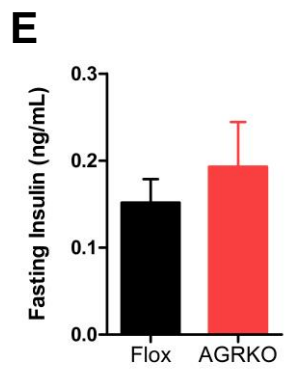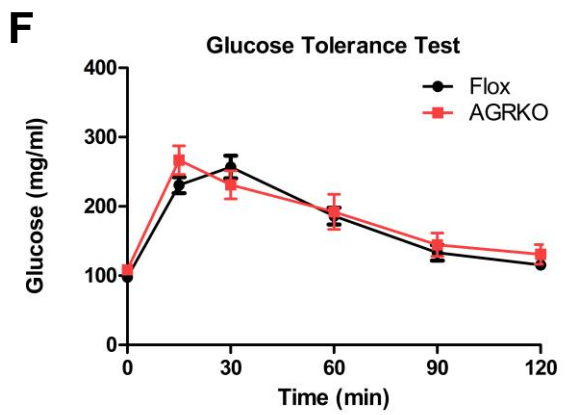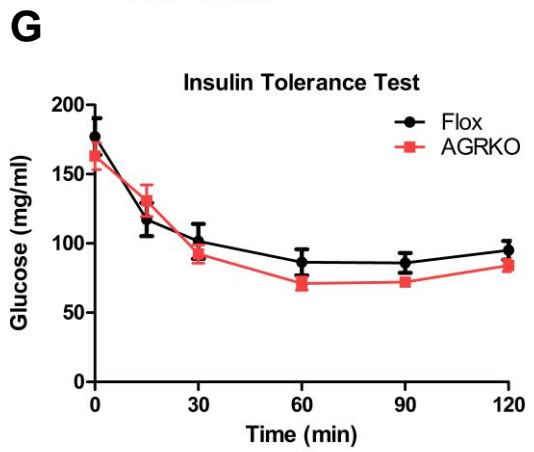

# Supplementary Figure 2.

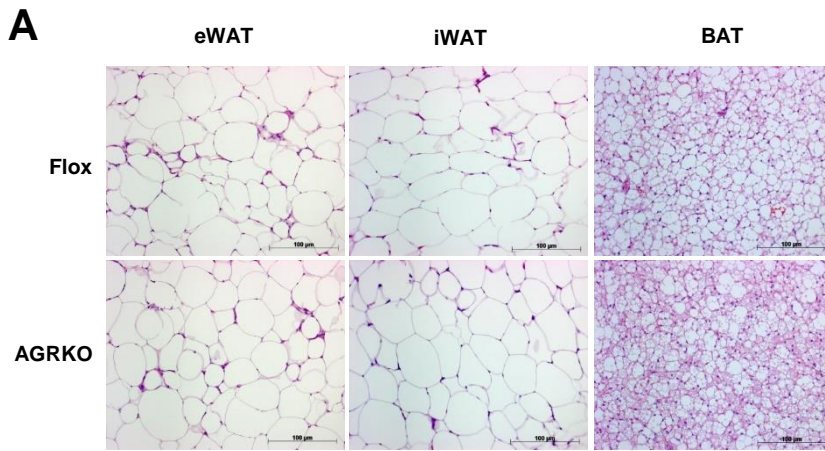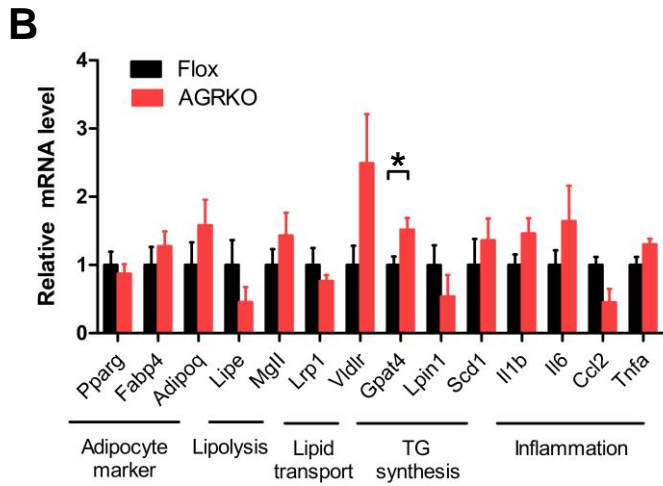

# Supplementary Figure 3.

**A**

|                   | Whole tissue | Adipocytes (TRAP) |
|-------------------|--------------|-------------------|
| <i>Nr3c1</i> (GR) | 99±12.4      | 105.3±16.1        |
| <i>Nr3c2</i> (MR) | 6.4±1.1      | 5.3±1             |

**B**

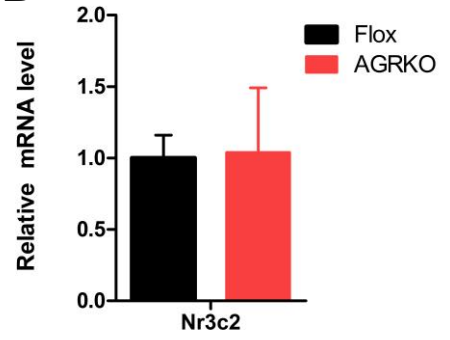

# Supplementary Figure 4.

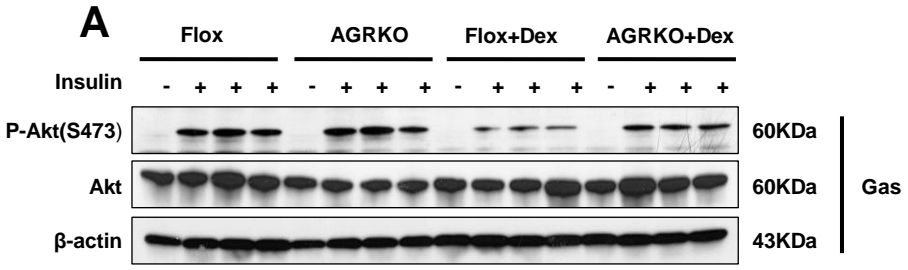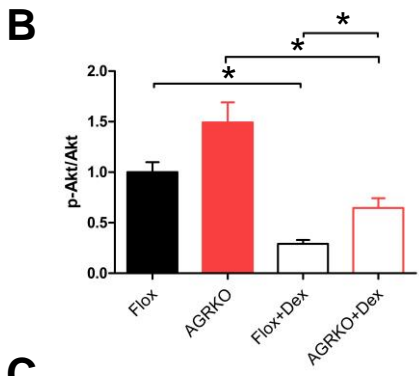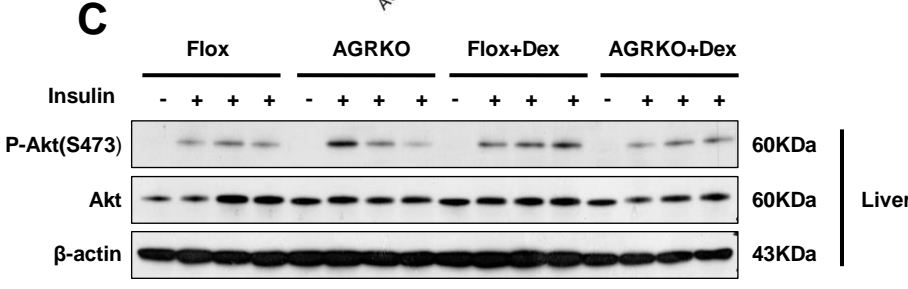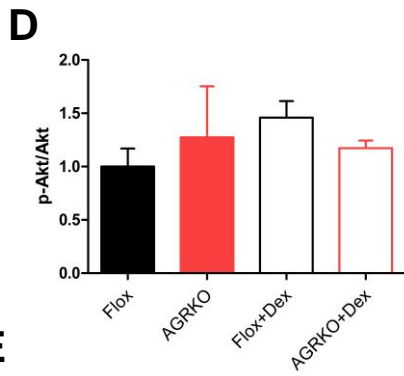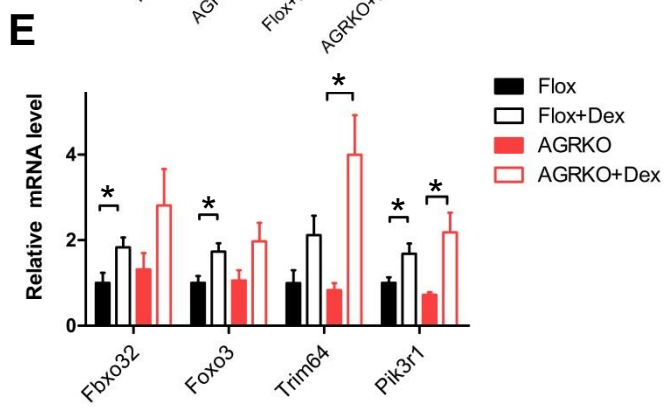

# Supplementary Figure 5.

**A**

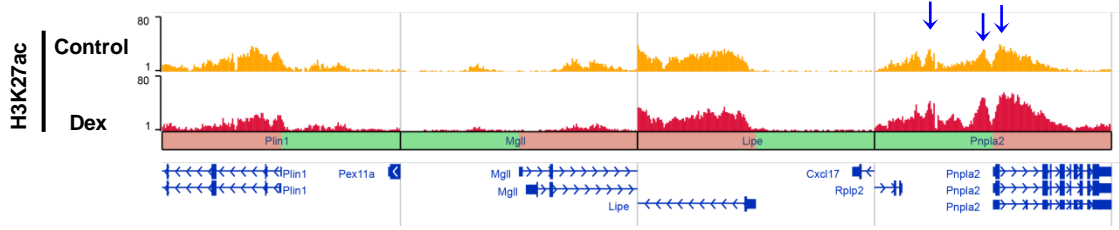

**B**

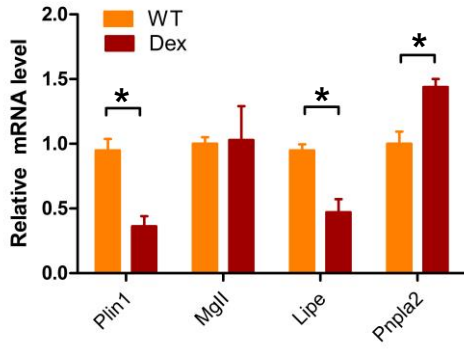

**C**

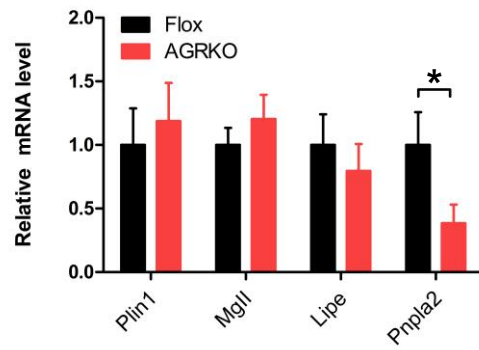

Supplement: mmc1.pdf [file mmc1.pdf]
