# Supplementary material for: Adipocyte glucocorticoid receptor is important in lipolysis and insulin resistance due to exogenous steroids, but not insulin resistance caused by high fat feeding
Source: PubMed Central journal article supplement — Mol Metab. 2017 Jun 29;6(10):1150–60. doi: 10.1016/j.molmet.2017.06.013 (PMC5641598; doi:10.1016/j.molmet.2017.06.013), 2017-06-29
Supplement: mmc2.pdf [file mmc2.pdf]

### Supplemental Table 1. Primer Sequences

| Gene          | Forward(5' to 3')        | Reverse (5' to 3')      |
|---------------|--------------------------|-------------------------|
| <i>36B4</i>   | AGATTCGGGATATGCTGTTGGC   | TCGGGTCCTAGACCAGTGTTTC  |
| <i>Pparg</i>  | GCATGGTGCCTTCGCTGA       | TGGCATCTCTGTGTCAACCATG  |
| <i>Fabp4</i>  | TTCGATGAAATCACCGCAGA     | AGGGCCCCGCCATCT         |
| <i>Adipoq</i> | TGCCGAAGATGACGTTACTA     | TCTCACCCCTTAGGACCAAGA   |
| <i>Lipe</i>   | GCTGGAGGAGTGTTTTTTTTGC   | AGTTGAACCAAGCAGGTCACA   |
| <i>Mgll</i>   | ACTCTGACCCACTCGTCTGC     | CAGCAGGAATGGCAGTGTC     |
| <i>Lrp1</i>   | GACCAGGTGTTGGACACAGATG   | AGTCGTTGTCTCCGTCACACTTC |
| <i>Vldlr</i>  | CTCCACCAACCTGCGGAGCC     | GCTGACGGCCACACTGCTCA    |
| <i>Gpat4</i>  | TGAAGTGCTTGCGAGATGTTG    | AGCAGTCAGCGTGATATTTCTTT |
| <i>Lpin1</i>  | CCTTCTATGCTGCTTTTGGGAAC  | GTGATCGACCACTTCGCAGAGC  |
| <i>Il1b</i>   | CAGGCAGGCAGTATCACTCA     | TGTCCTCATCCTGGAAGGTC    |
| <i>Il6</i>    | GTTCTCTGGGAAATCGTGGA     | CAGAATTGCCATTGCACAAC    |
| <i>Ccl2</i>   | CAAGAAGGAATGGGTCCAGA     | AGACCTTAGGGCAGATGCAG    |
| <i>Tnfa</i>   | AGTCCGGGCAGGTCTACTTT     | ATGAACACCCATTCCCTTCA    |
| <i>Nr3c2</i>  | AGTTCCTTTCCGCCTGTCAA     | TGACACCCAGAAGCCTCATC    |
| <i>Fbxo32</i> | AGCGCTTCTTGATGAGAAA      | GGCTGCTGAACAGATTCTCC    |
| <i>Foxo3</i>  | TTCAACAGTACCGTGTTTGGAC   | AGTGTGACACGGAAGAGAAGGT  |
| <i>Trim64</i> | GAGCAGCTGGAAAAGTCCAC     | CTTGGCACTTGAGAGGAAGG    |
| <i>Pik3r1</i> | CAAAGCGGAGAACCTATTGC     | ATAGCAGCCCTGCTTACTGC    |
| <i>Ucp1</i>   | ACTGCCACACCTCCAGTCATT    | CTTTGCCTCACTCAGGATTGG   |
| <i>Prdm16</i> | CAGCACGGTGAAGCCATTC      | GCGTGCATCCGCTTGTG       |
| <i>Pgc1a</i>  | CCCTGCCATTGTTAAGACC      | TGCTGCTGTTCCCTGTTTTTC   |
| <i>Dio2</i>   | GTGGCTGACTTCCCTGTTGGT    | GCACACACGTTCAAAGGCTA    |
| <i>Elovl3</i> | TCCGCGTTTCTCATGTAGGTCT   | GGACCTGATGCAACCCTATGA   |
| <i>Cox8b</i>  | GAACCATGAAGCCAACGACT     | GCGAAGTTCACAGTGGTTCC    |
| <i>Scd1</i>   | TTCTTGCGATACTCTGGTG      | CGGGATTGAATGTTCTTGTGC   |
| <i>Retn</i>   | ACAAGACTTCAACTCCCTGTTTTC | TTTCTTCACGAATGTCCCACG   |
| <i>Nnat</i>   | ACCCACTTTTCGGAACCATG     | CAGCTTCTGCAGGGAGTAC     |
| <i>Lep</i>    | GAGACCCCTGTGTGCGGTTTC    | CTGCGTGTGTGAAATGTCATTG  |
